# Supplementary material for: Absolute configuration and predominant conformations of 1,1-dimethyl-2-phenylethyl phenyl sulfoxide
Source: Royal Society of Chemistry journal article supplement (doi:10.1039/b501220a), 2005-01-01
Supplement: b501220a.doc [file b501220a.doc]

Supplementary material for

Absolute Configuration and Predominant Conformations of 1,1-dimethyl-2-phenylethyl phenyl sulfoxide

*Ana G. Petrovica, Jiangtao Hea, Prasad L. Polavarapua*, Ling S. Xiaob, and Daniel W. Armstrongb*

**Table S-1:** B3LYP/6-31+Gpredictions ofconverged dihedral angles, energies andrelative populations of the four minimum-energy conformers of **1**.

| 6-31+G | Converged Dihedral Anglesb | | | |  |  |
| --- | --- | --- | --- | --- | --- | --- |
| Conformersa | D(2,3,12,13) | D(3,12,13,22) | D(12,13,22,30) | D(13,22,30,25) | Gibbs Energiesc | Fractional  Population |
| G+T | 85.7 | 59.1 | 168.8 | -93.8 | -1093.717477 | 0.41 |
| TG+ | 85.6 | 169.3 | 62.8 | -92.7 | -1093.716819 | 0.21 |
| TT | 86.8 | 177.0 | -178.9 | -90.7 | -1093.716792 | 0.20 |
| G-T | 88.0 | -65.5 | -171.2 | -88.3 | -1093.716704 | 0.18 |

aT, G+ and G- represent anti, plus gauche and minus gauche conformers. The first letter represents the conformation around bond B and the second letter around bond C. See Figures 1-3.

bD stands for dihedral angle in degrees. The numbers inside of the parentheses indicate atom-numbers as shown in Figure 1.

cin Hartrees


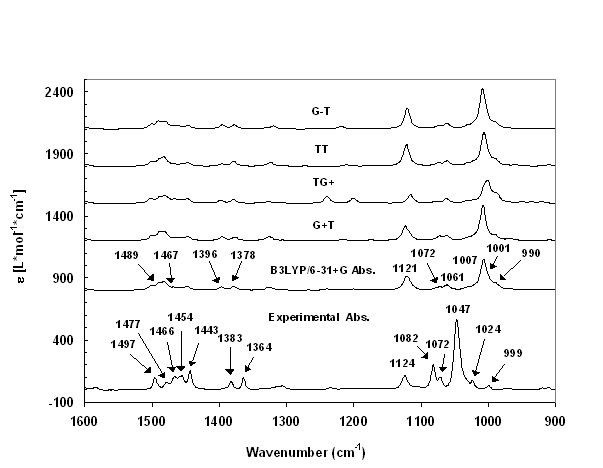


**Figure S-1**: B3LYP/6-31+G calculated vibrational absorption spectra for four conformers (top four traces), population weighted predicted absorption spectrum of 1,1-dimethyl-2-phenylethyl phenyl sulfoxide and experimental (bottom trace, 0.1355M in CCl4 solvent; path length 200 m) absorption spectrum of 1,1-dimethyl-2-phenylethyl phenyl sulfoxide**.** Lorentzian band shapes and 5 cm-1 half-width (at half-peak height) were used in spectral simulation; Calculated frequencies were scaled by 0.9899.

**
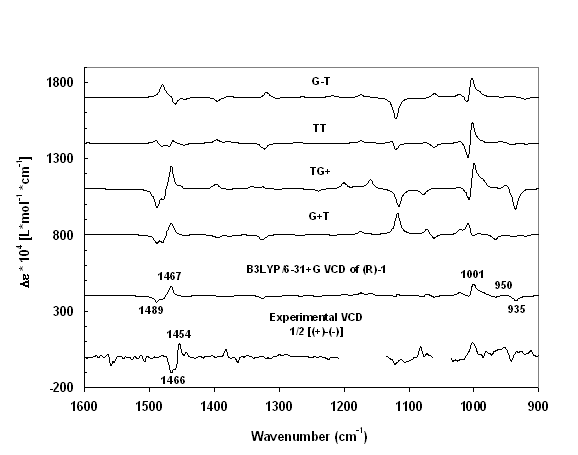
**

**Figure S-2**: B3LYP/6-31+G calculated VCD spectra for four conformers (top four traces), population weighted predicted VCD spectrum of (*R*)-1,1-dimethyl-2-phenylethyl phenyl sulfoxide and experimental (bottom trace, 0.1355M in CCl4 solvent; path length 200 m) VCD spectrum of (+)-1,1-dimethyl-2-phenylethyl phenyl sulfoxide**.** Lorentzian band shapes and 5 cm-1 half-width (at half-peak height) were used in spectral simulation; Calculated frequencies were scaled by 0.9899.


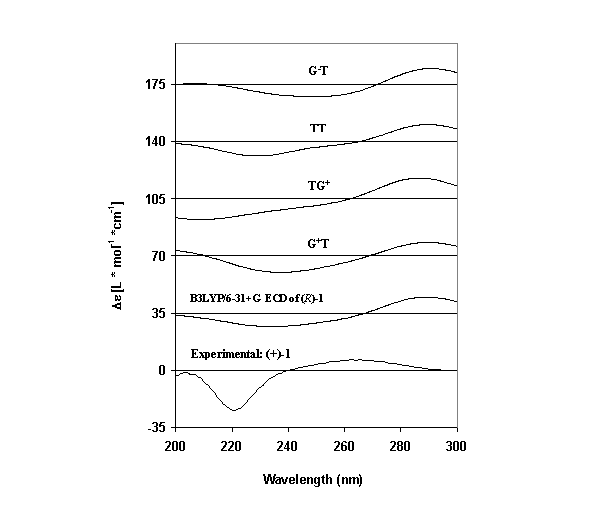


**Figure S-3**: B3LYP/6-31+G calculated ECD spectra for four conformers (top four traces), population weighted predicted ECD spectrum of (*R*)-1,1-dimethyl-2-phenylethyl phenyl sulfoxide and experimental (bottom trace) ECD spectrum of (+)-1,1-dimethyl-2-phenylethyl phenyl sulfoxide**.** The experimental ECD intensities presented in this figure were scaled up by a factor of six. Gaussian band shapes and 20 nm half-width (at 1/e of peak height) were used to simulate the predicted spectra.

**Table S-2:** B3LYP/6-311G(2d,2p)predictions ofconverged dihedral angles, energies andrelative populations of the four minimum-energy conformers of **1**.

| 6-311G(2d,2p) | Converged Dihedral Anglesb | | | |  |  |
| --- | --- | --- | --- | --- | --- | --- |
| Conformersa | D(2,3,12,13) | D(3,12,13,22) | D(12,13,22,30) | D(13,22,30,25) | Gibbs Energiesc | Fractional  Population |
| G+T | 85.2 | 60.5 | 168.6 | -94.2 | -1093.906587 | 0.48 |
| TG+ | 85.7 | 170.1 | 62.6 | -92.4 | -1093.905582 | 0.17 |
| TT | 86.3 | 178.0 | -177.9 | -90.8 | -1093.905665 | 0.18 |
| G-T | 87.5 | -65.1 | -171.1 | -88.0 | -1093.905606 | 0.17 |

aT, G+ and G- represent anti, plus gauche and minus gauche conformers. The first letter represents the conformation around bond B and the second letter around bond C. See Figures 1-3.

bD stands for dihedral angle in degrees. The numbers inside of the parentheses indicate atom-numbers as shown in Figure 1.

cin Hartrees


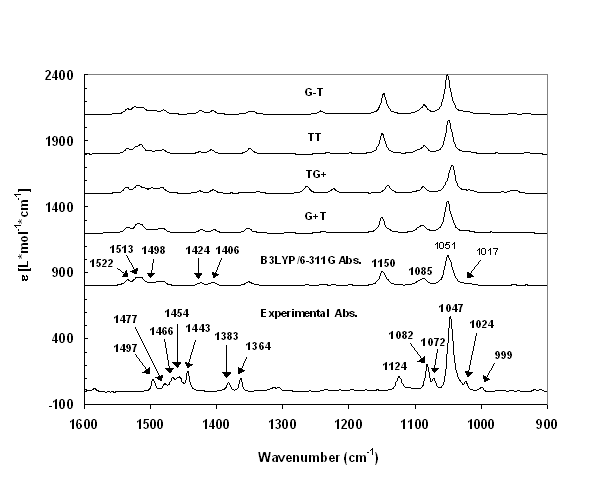


**Figure S-4**: B3LYP/6-311G(2d,2p) calculated vibrational absorption spectra for four conformers (top four traces), population weighted predicted absorption spectrum of 1,1-dimethyl-2-phenylethyl phenyl sulfoxide and experimental (bottom trace, 0.1355M in CCl4 solvent; path length 200 m) absorption spectrum of 1,1-dimethyl-2-phenylethyl phenyl sulfoxide**.** Lorentzian band shapes and 5 cm-1 half-width (at half-peak height) were used in spectral simulation. Calculated frequencies were not scaled.


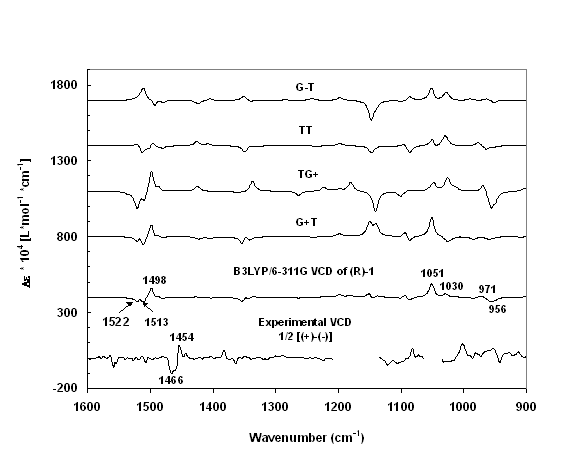


**Figure S-5**: B3LYP/6-311G(2d,2p) calculated VCD spectra for four conformers (top four traces), population weighted predicted VCD spectrum of (*R*)-1,1-dimethyl-2-phenylethyl phenyl sulfoxide and experimental (bottom trace, 0.1355M in CCl4 solvent; path length 200 m) VCD spectrum of (+)-1,1-dimethyl-2-phenylethyl phenyl sulfoxide**.** Lorentzian band shapes and 5 cm-1 half-width (at half-peak height) were used in spectral simulation. Calculated frequencies were not scaled.


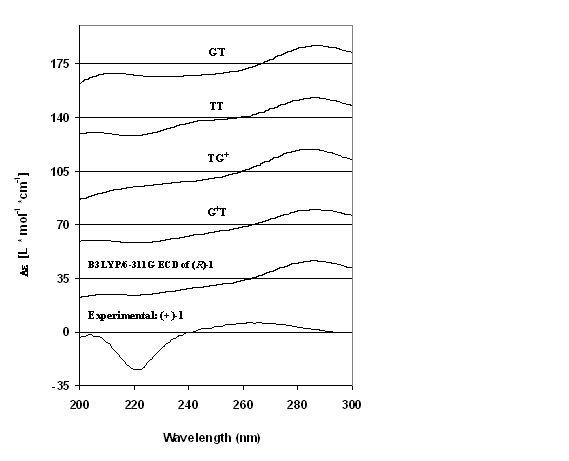


**Figure S-6**: B3LYP/6-311G(2d,2p) calculated ECD spectra for four conformers (top four traces), population weighted predicted ECD spectrum of (*R*)-1,1-dimethyl-2-phenylethyl phenyl sulfoxide and experimental (bottom trace) ECD spectrum of (+)-1,1-dimethyl-2-phenylethyl phenyl sulfoxide**.** The experimental ECD intensities presented in this figure were scaled up by a factor of six. Gaussian band shapes and 20 nm half-width (at 1/e of peak height) were used to simulate the predicted spectra.
